# Supplementary material for: Methylophiopogonanone B of Radix Ophiopogonis protects cells from H2O2-induced apoptosis through the NADPH oxidase pathway in HUVECs
Source: PubMed Central journal article supplement — Mol Med Rep. 2019 Aug 29;20(4):3691–700. doi: 10.3892/mmr.2019.10625 (PMC6755187; doi:10.3892/mmr.2019.10625), 2019-08-29

Figure S1. High-performance liquid chromatography-ultraviolet chromatogram of methylophiopogonanone B and its chemical formula. The elution time of MO-B was 7.4 min.

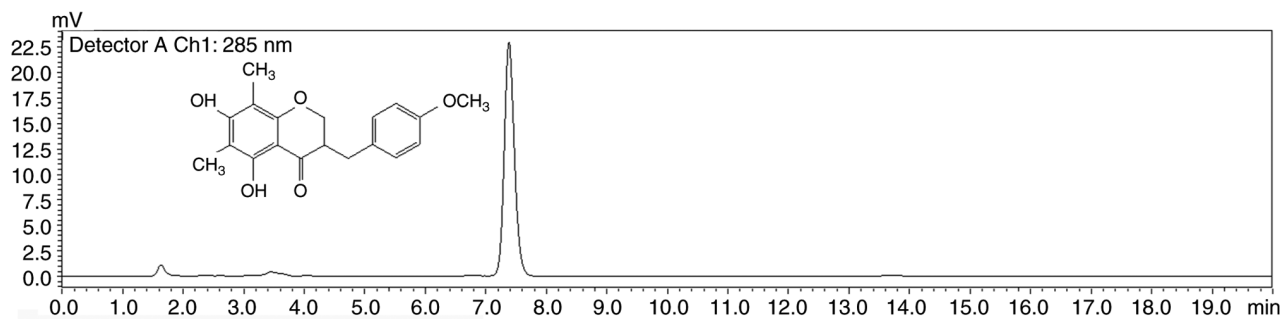

Supplement: Supplementary_Data.pdf [file Supplementary_Data.pdf]
